# Supplementary material for: Aerosol characterisation in the subtropical eastern North Atlantic region using long-term AERONET measurements
Source: Copernicus journal article supplement (doi:10.5194/acp-22-11105-2022), 2022-08-31
Supplement: Supplementary file 1 [file acp-22-11105-2022-supplement.pdf]

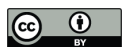

*Supplement of*

## **Aerosol characterisation in the subtropical eastern North Atlantic region using long-term AERONET measurements**

**África Barreto et al.**

*Correspondence to:* África Barreto (abarretov@aemet.es)

The copyright of individual parts of the supplement might differ from the article licence.

## S1 Dust-laden conditions at IZO and TPO

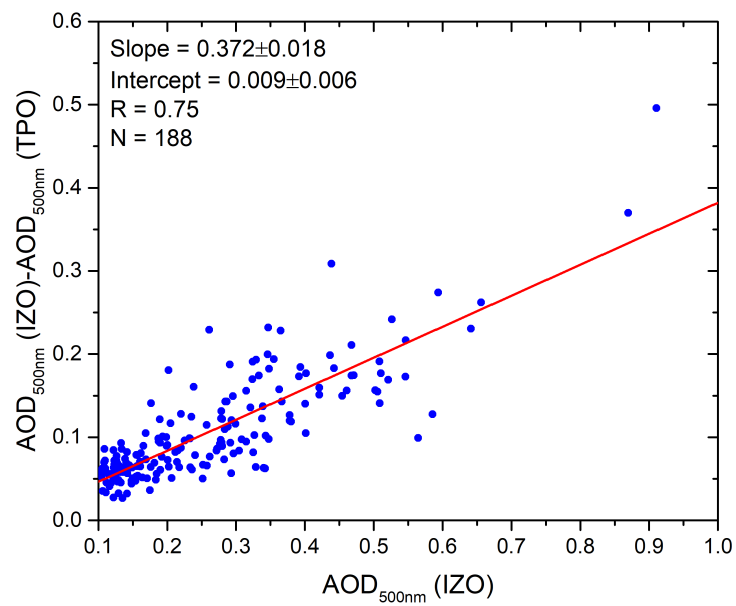

**Figure S1.** Scatterplot of the difference between  $AOD_{500nm}$  performed at IZO and TPO under dust-laden conditions versus  $AOD_{500nm}$  performed at IZO. The fitting parameters are shown in the legend. R is the Pearson correlation and N is the number of data points.

## S2 Long-Term trends

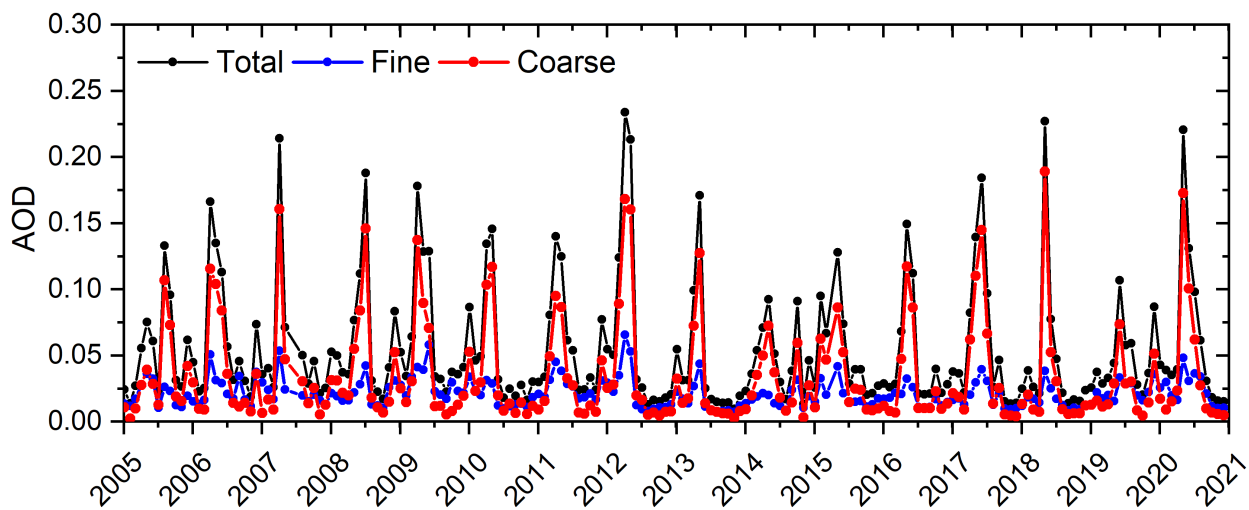

**Figure S2.** Series of monthly mean values of total (black), fine (blue) and coarse-mode AOD (red) at IZO between 2005 and 2020.

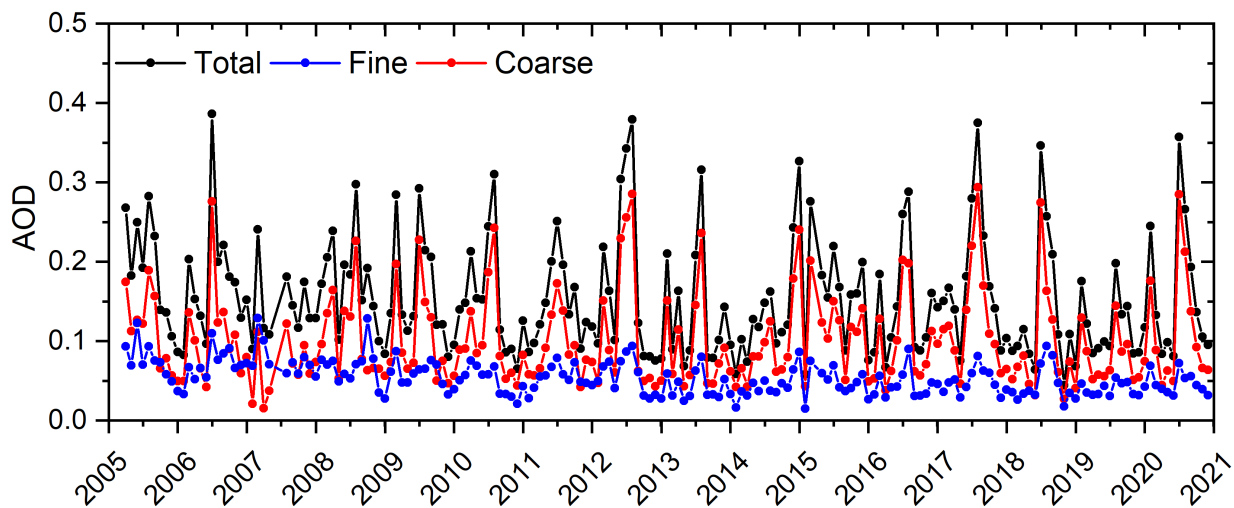

**Figure S3.** Series of monthly mean values of total (black), fine (blue) and coarse-mode AOD (red) at SCO between 2006 and 2020.
